# Supplementary material
Source: publisher figshare collection journal article supplement (https://springernature.figshare.com/ndownloader/files/18610706)

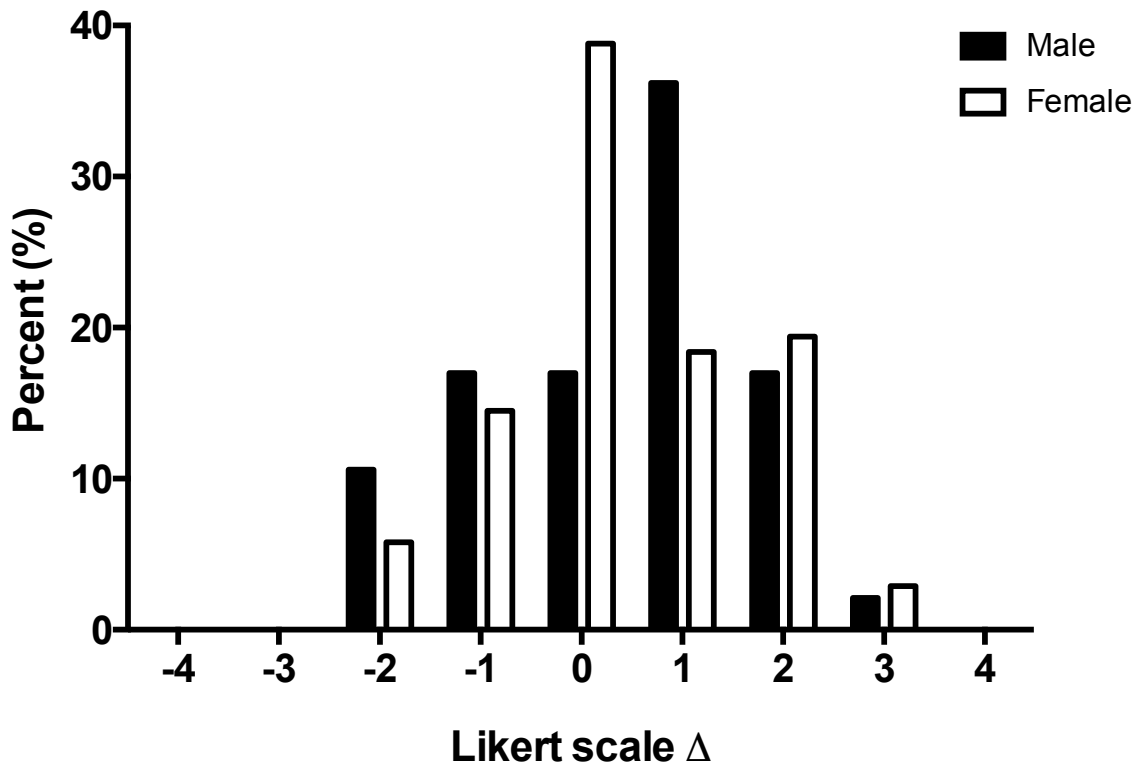

Supplement: Supplementary file [file 18610706]
